# Supplementary material for: Angpt2/Tie2 autostimulatory loop controls tumorigenesis
Source: PubMed Central journal article supplement (PMC9081903; doi:10.15252/emmm.202114364), 2022-03-10
Supplement: EMMM-14-e14364-s002.pdf [file EMMM-14-e14364-s002.pdf]

## Expanded View Figures

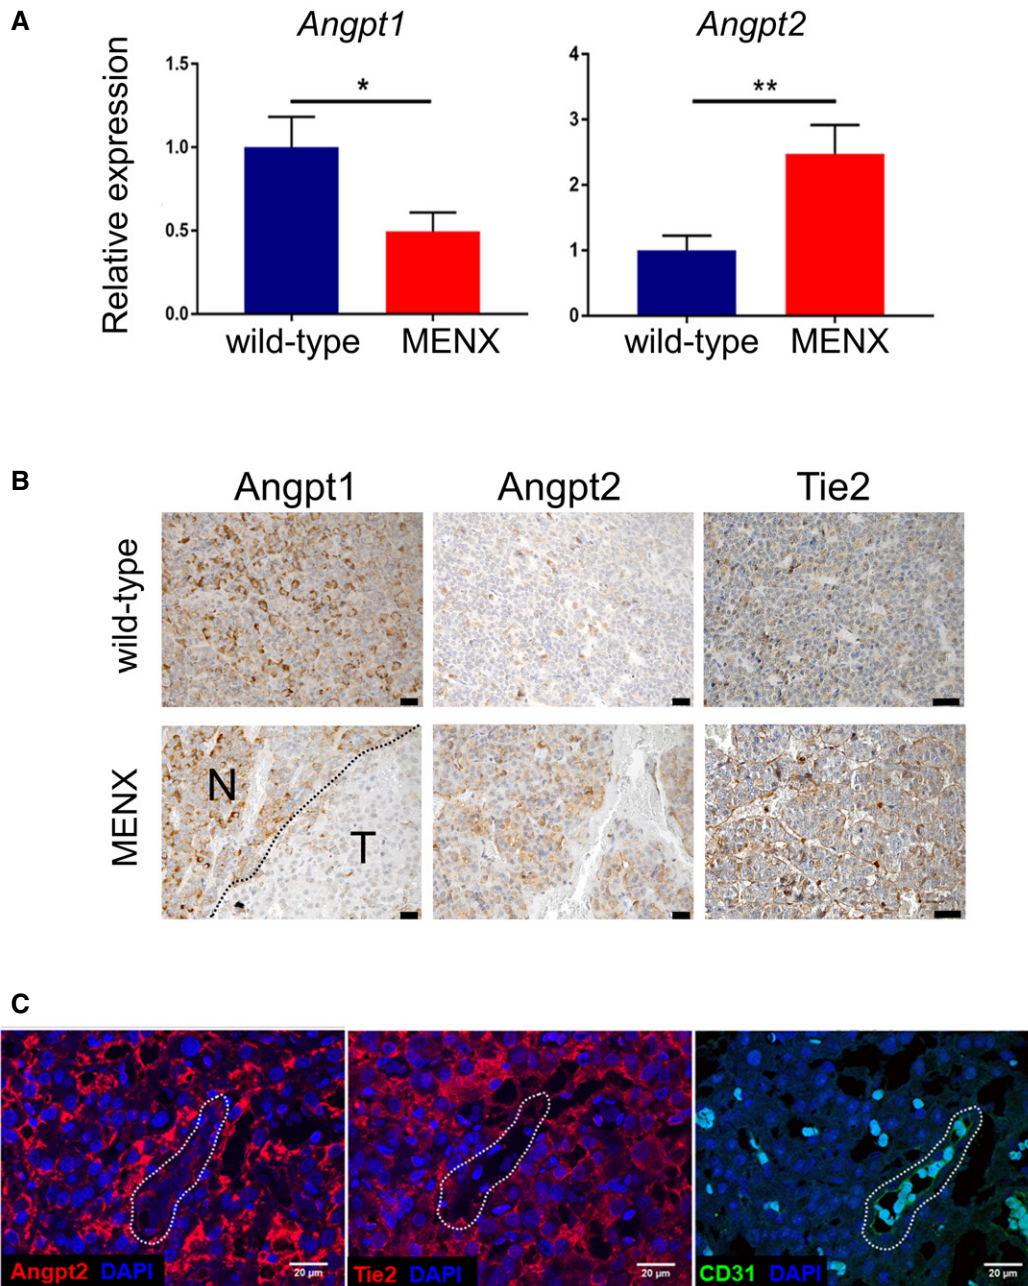

**Figure EV1. Angpt2 is expressed in rat primary NF-PitNETs together with Tie2 and Angpt1.**

**A** qRT-PCR for *Angpt1* and *Angpt2* was performed on pituitary samples from tumor-bearing MENX mutant rats ( $n = 10, 12$ , respectively) and wild-type control rats ( $n = 5, 8$ ). Data are expressed as mean  $\pm$  SEM.  $*P = 0.049$ ;  $**P = 0.008$  by  $t$ -test.

**B** IHC was performed on pituitary tissues from wild-type ( $n = 5$ ) and MENX mutant rats ( $n = 10$ ) using antibodies against Angpt1, Angpt2. Representative stainings are shown. Original magnification: 400 $\times$ ; scale bar: 20  $\mu$ m. N, normal area; T, tumor area.

**C** Expression of Angpt2, Tie2, and CD-31 in rat NF-PitNETs and associated ECs (used as positive control). Consecutive tissue sections of rat NF-PitNETs ( $n = 4$ ) were stained with the indicated antibodies. One representative tumor is shown. The dashed shape indicates the vessel present in the consecutive slides. Original magnification: 200 $\times$ ; scale bar: 20  $\mu$ m.

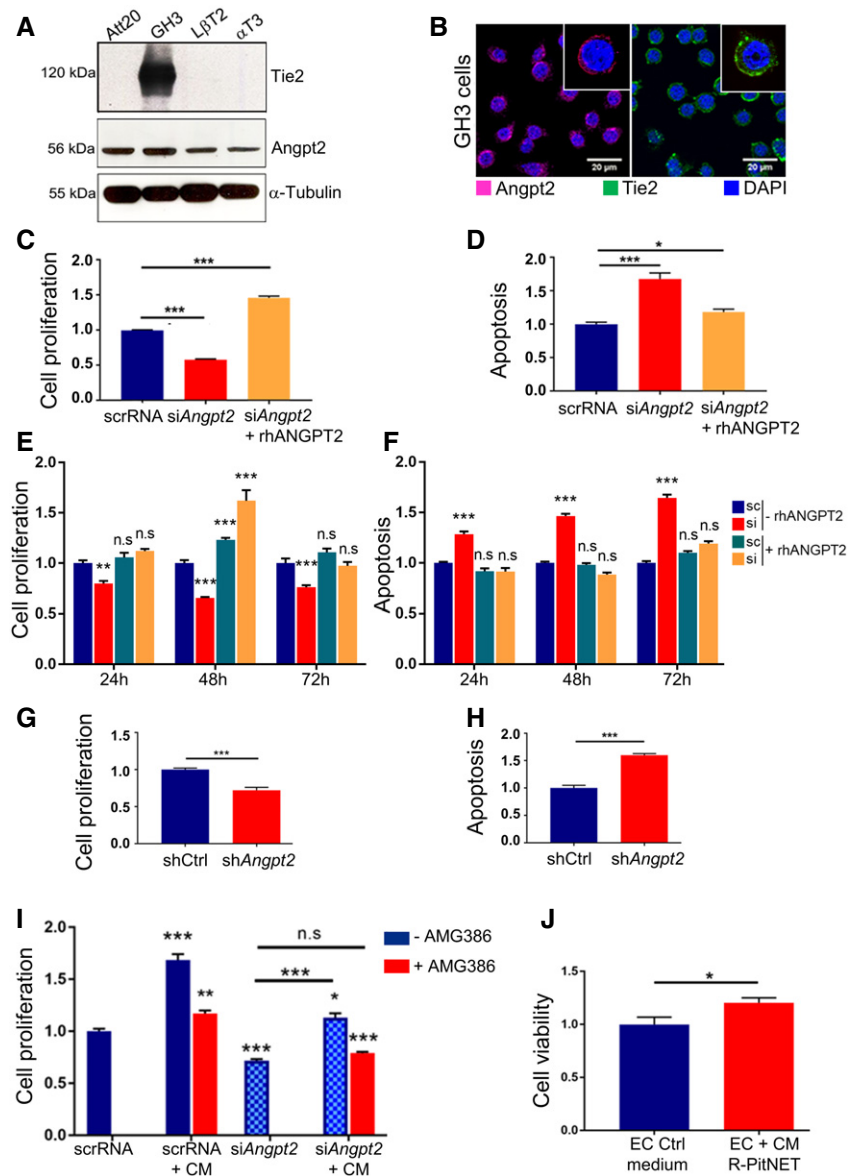

**Figure EV2. PitNET cells express Angpt2 and Tie2, and intrinsic Angpt2 promotes PitNET cell survival *in vitro*.**

**A** Expression of Angpt2 and Tie2 was assessed in Att20, GH3, LβT2 and αT3 cells by western blotting (WB) using specific antibodies. α-Tubulin was included as loading control.

**B** Immunofluorescence (IF) of GH3 cells for Angpt2 (red) and Tie2 (green). Nuclei were counterstained with DAPI (blue). Original magnification: 400x; scale bar: 20 μm. Panels shown are representative of 3 independent experiments.

**C** Cell proliferation of GH3 cells transfected with siAngpt2 or scrRNA POOLS and incubated with rhANGPT2 (+rhANGPT2) or left untreated (–rhANGPT2) normalized against scrRNA-transfected cells. \*\*\**P* < 0.0001 (one-way ANOVA).

**D** In samples parallel to (C), activated caspase-3/7 was measured to assess for apoptosis. \*\*\**P* < 0.0001; \**P* = 0.0411 (one-way ANOVA).

**E** Cell proliferation of GH3 cells transfected with the individual siAngpt2 or scrRNA and incubated with rhANGPT2 (+rhANGPT2) or left untreated (–rhANGPT2) normalized against scrRNA-transfected, untreated (scr–rhANGPT2) cells. n.s., not significant; \*\*\**P* < 0.0001; \*\**P* < 0.002 (one-way ANOVA).

**F** In samples parallel to (E), activated caspase-3/7 was measured to assess for apoptosis. n.s., not significant; \*\*\**P* < 0.0001 (one-way ANOVA).

**G** Cell proliferation of GH3-shAngpt2 (#2) cells or cells transfected with shCtrl was measured 24h later and normalized against shCtrl. \*\*\**P* < 0.0001 (*t*-test).

**H** In samples parallel to (G), activated caspase-3/7 was measured to assess for apoptosis. \*\*\**P* < 0.0001 (*t*-test).

**I** GH3 cells transfected with siAngpt2 or scrRNA POOLS were incubated with conditioned medium (CM) from rat primary PitNET cells for 24 h. CM was pre-incubated with AMG386 (red bars), or left untreated (blue bars). Cell proliferation was measured and normalized against that of scrRNA-transfected cells. n.s., not significant; \*\*\**P* < 0.0001; \*\**P* = 0.00116; \**P* = 0.0192 by two-way ANOVA.

**J** Cell viability of isolated rat primary EC cells incubated with CM from isolated rat primary PitNET cells. The experiments was performed independently 2 times, each with 3 technical replicates. Results are expressed as mean ± SEM. \**P* < 0.0368 (*t*-test). (C–I) Data are expressed as the mean ± SEM of three biological replicates, each with 3–6 technical replicates.

Source data are available online for this figure.

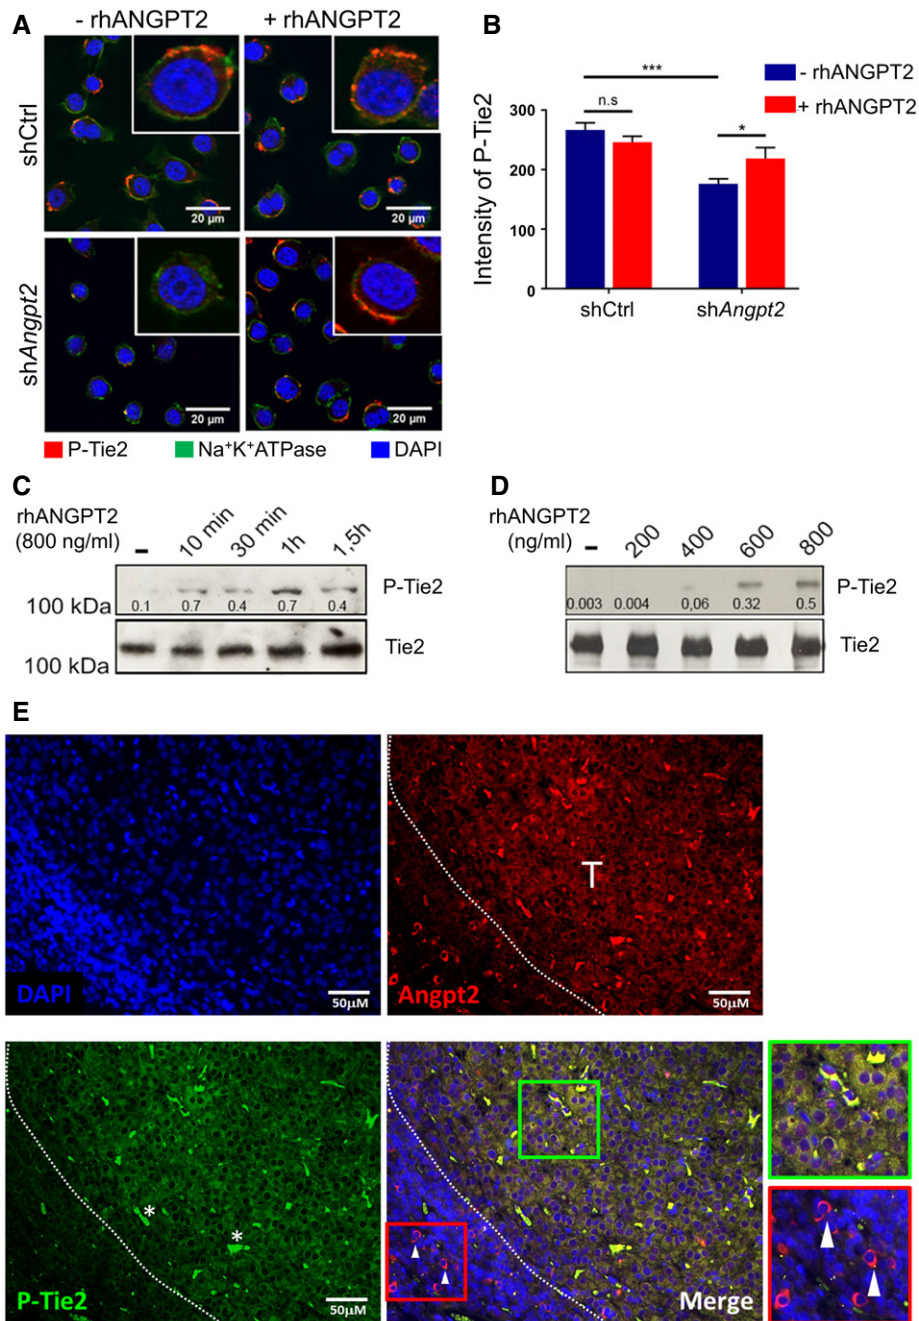

### Figure EV3. Tie2 on PitNET cells is phosphorylated and can be stimulated by Angpt2.

- A** Co-IF for both P-Tie2 (Tyr 1102/1108; red) and for Na<sup>+</sup>K<sup>+</sup>ATPase (green), used as plasma membrane marker, of GH3 cells transduced with unspecific shRNA (shCtrl) and shAngpt2 (#2) and incubated with rhANGPT2 or left untreated. Original magnification: 400 $\times$ ; scale bar: 20  $\mu$ m.
- B** Quantification of P-Tie2 immunostaining intensity in cells shown in (A) shCtrl-transduced GH3 cells (266.71  $\pm$  12.12); in shAngpt2 cells (176.04  $\pm$  8.46); in control cells treated with rhANGPT2: shCtrl + rhANGPT2: 246.33  $\pm$  9.79 (versus shCtrl, not significant by *t*-test); in treated knockdown cells: shAngpt2 + rhANGPT2: 218.68  $\pm$  18.16 (versus shC2; \**P* = 0.0421 by *t*-test). The experiment was performed twice each with three technical replicates. Intensities are expressed as arbitrary units  $\pm$  SEM. \*\*\**P* < 0.0001 by *t*-test.
- C** Tie2 and P-Tie2 expression in serum-starved GH3 cells transfected with siAngpt2 POOLS and stimulated with rhANGPT2 for the indicated times.
- D** Tie2 and P-Tie2 expression in cells as in (C) stimulated with the indicated doses of rhANGPT2 for 30 min.
- E** Co-IF for Angpt2 (red) and P-Tie2 (green) of a representative rat primary NF-PitNET. Nuclei were counterstained with DAPI. White arrows point to Angpt2-positive (P-Tie2 negative) cells in adjacent non-tumor area. Scale bars: 50  $\mu$ m. T, tumor area.

Data information: (C, D) Blots shown in all panels are representative of three independent experiments. The numbers represent the ratio phospho/total proteins. Source data are available online for this figure.

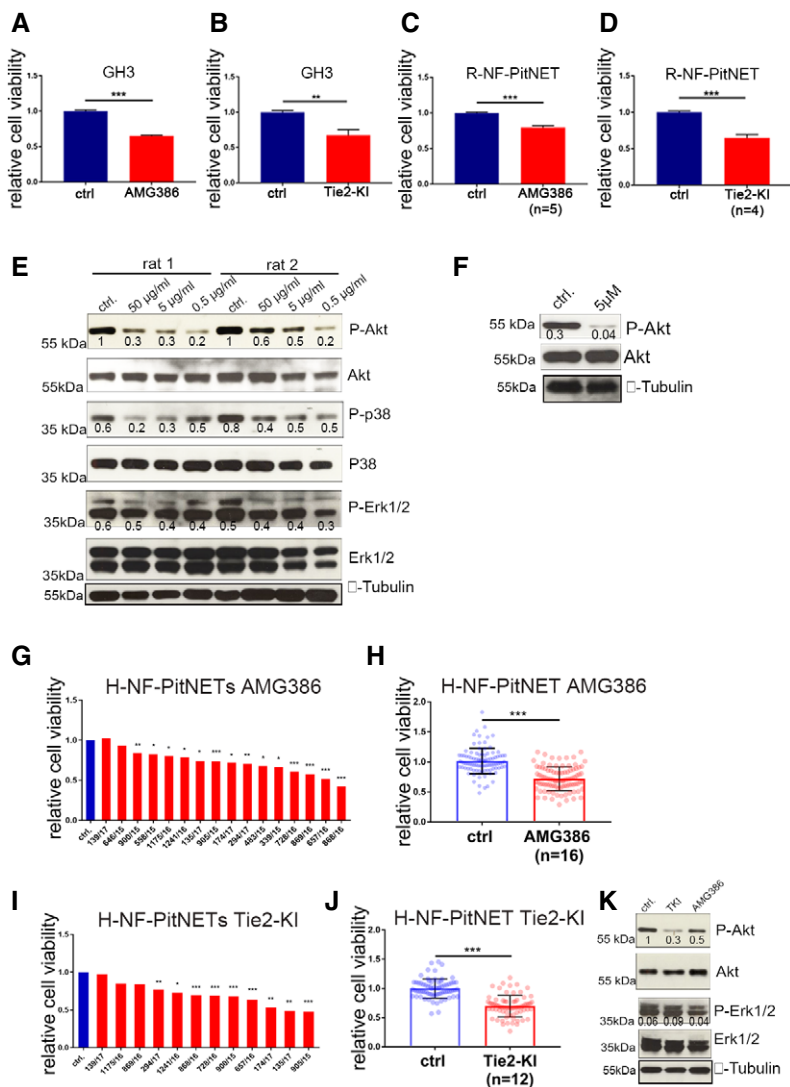

**Figure EV4. Pharmacological Ang/Tie2 pathway inhibition reduces the viability of PitNET cell lines, and of rat/human primary cultures *in vitro*.**

A, B Cell proliferation of GH3 cells treated with 5 µg/ml AMG386 (A) or 5 µM Tie2-KI (B) or left untreated (ctrl) normalized against untreated cells. \*\*\*P < 0.0001; \*\*P = 0.0072 (t-test). Results are expressed as mean ± SEM of three biological replicates with 6 technical replicates.

C, D Cell viability of rat primary PitNET cells (R-PitNET) treated with AMG386 (n = 5 rats) (C) or Tie2-KI (n = 4 rats) (D) or left untreated (ctrl) normalized against untreated cells. Primary cultures were treated, each with 6 technical replicates. Results are expressed as mean ± SD. \*\*\*P < 0.0001 (t-test).

E Expression of phosphorylated (P) and total Akt, p38 and Erk1/2 in two R-PitNET cultures with enough cells upon treatment with AMG386.

F Expression of phosphorylated (P) and total Akt in one R-PitNET culture treated with Tie2-KI or left untreated (ctrl).

G–J Cell viability of human primary PitNET cultures treated with (G, H) AMG386 (n = 16) or (I, J) Tie2-KI (n = 12) normalized against untreated control cells for each patient (set to 1). Significance in (G, I): \*P < 0.05; \*\*P < 0.01; \*\*\*P < 0.001 (by t-test, comparing each treated sample with its untreated control). Results in (H) and (J) are expressed as mean ± SEM of the normalized values of 6 technical replicates for each samples. Each dot represents the relative cell viability of one technical replicate. Significance in (H, J) \*\*\*P < 0.0001 (t-test).

K Example of responsive H-PitNET treated with AMG386 or Tie2-KI. Total proteins were extracted and probed for P- and total Akt and Erk1/2. Anti-α-tubulin antibody as used to check for equal loading. The blot shown is representative of three independent cultures.

Data information: (E, F) Blots shown are representative of 3 independent experiments. (E, F, K) The numbers below the bands represent the ratio phospho/total proteins. Source data are available online for this figure.
